# Supplementary material for: Leveraging Domain Expertise in Machine Learning for Critical Metal Prospecting in the Oslo Rift: A Case Study for Fe-Ti-P-Rare Earth Element Mineralization
Source: MDPI journal article supplement (doi:10.3390/min14040377), 2024-04-03
Supplement: s1 [file s1]

Archive with 1 entries (1 files):
- minerals-2924287 - Supplementary - ROC curve classification RF model.pdf
