# Supplementary material for: Leveraging Domain Expertise in Machine Learning for Critical Metal Prospecting in the Oslo Rift: A Case Study for Fe-Ti-P-Rare Earth Element Mineralization
Source: MDPI journal article supplement (doi:10.3390/min14040377), 2024-04-03
Supplement: s1 [file s1 › minerals-2924287 - Supplementary - ROC curve classification RF model.pdf]

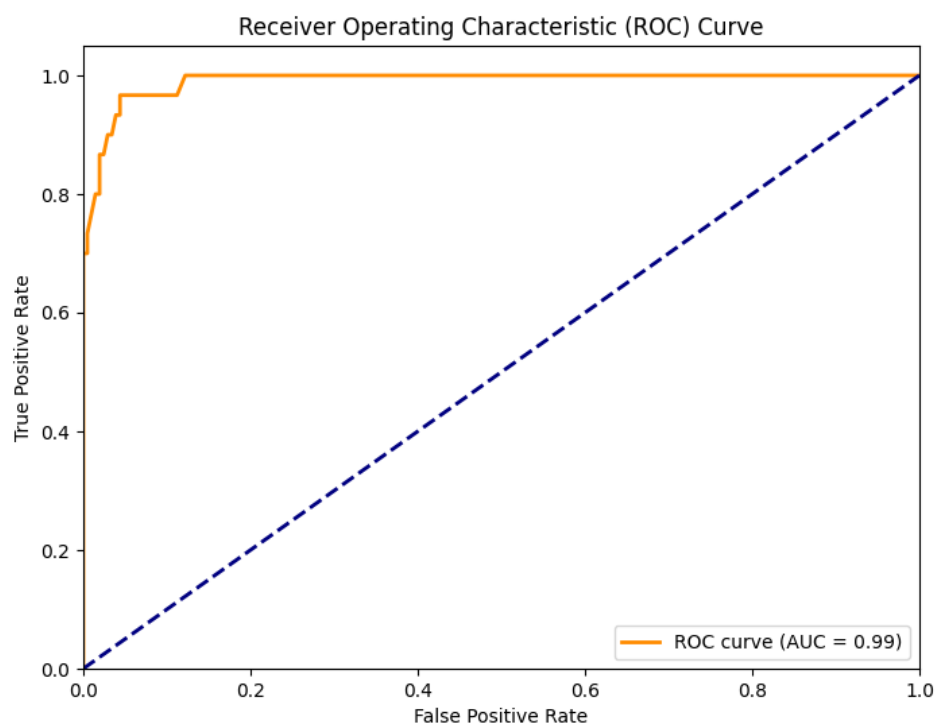

**Figure S1.** the Receiver Operating Characteristic (ROC) curve of the Random Forest classification model. The ROC curve illustrates the performance of the model by presenting the trade-off between its true positive rate and false positive rate across various classification thresholds. It provides valuable insights into the model's ability to discriminate between different classes, with a higher Area Under the Curve (AUC) generally indicating superior discriminatory performance.
